# Supplementary material for: Polypyrrole/PU hybrid hydrogels: electrically conductive and fast self-healing for potential applications in body-monitor sensors
Source: Royal Society of Chemistry journal article supplement (doi:10.1039/d1nj00616a), 2021-01-01
Supplement: d1nj00616a1.pdf [file d1nj00616a1.pdf]

## **Polypyrrole/PU hybrid hydrogels: electrically conductive and fast self-healing for the potential application in body-monitor sensor**

Zhanyu Jia<sup>a</sup>, Guangyao Li<sup>a</sup>, Juan Wang<sup>a</sup>, Shouhua Su<sup>a</sup>, Jie Wen<sup>a</sup>, Jinfeng Yuan<sup>a,b</sup>, Mingwang Pan<sup>\*a,b</sup>,

Zhicheng Pan<sup>\*a,b</sup>

a. Institute of Polymer Science and Engineering, School of Chemical Engineering and Technology,

Hebei University of Technology, Tianjin 300130, PR China

b. Hebei Key Laboratory of Functional Polymers, Hebei University of Technology, Tianjin 300130,

PR China

\*E-mail: mwpan@126.com; panz@hebut.edu.cn

New Journal of Chemistry

**Table S1.** Compare of self-healing hydrogels (Materials, Mechanical properties, Self-healing conditions and efficiency, Functionalization, and Water content)

| Materials                              | Mechanical properties                                                                                              | Self-healing conditions, self-healing efficiency  | Functionality            | Water content |
|----------------------------------------|--------------------------------------------------------------------------------------------------------------------|---------------------------------------------------|--------------------------|---------------|
| PUASPy-0.2 <sup>[1]</sup>              | Breaking elongation and ultimate tensile strength are 554 % and 1.1 MPa                                            | 10 min, 50 °C, 58 % efficiency                    | Conductive               | 72 %          |
| PU10 <sup>[2]</sup>                    | Breaking elongation and ultimate tensile strength are 2000 % and 0.382 MPa                                         | 10 min, room temperature, 86.6 % efficiency       | None                     | 62 %          |
| PVA-TA300(S) <sup>[3]</sup>            | Breaking elongation and ultimate tensile strength are 630 % and 5.6 MPa                                            | 1 h, room temperature, 39.8 % efficiency          | Adhesiveness             | 40 %          |
| CNC-PEG <sup>[4]</sup>                 | Breaking elongation and ultimate tensile strength are 690 % and 0.3 MPa                                            | 24 h, 90 °C, 78 % efficiency                      | None                     | 96 %          |
| PANI/PSS-20UPy <sup>[5]</sup>          | Breaking elongation and ultimate tensile strength are 650 % and 0.1 MPa                                            | 30 s, room temperature, 100 % efficiency          | Conductive               | 78 %          |
| A6ACA <sup>[6]</sup>                   | Breaking elongation and ultimate tensile strength are 580 % and 0.055 MPa                                          | 2s, pH<3, not mentioned                           | Adhesiveness             | 94 %          |
| pAA-6 $\beta$ CD/pAA-Fc <sup>[7]</sup> | Continuous step strain measurements: G' of the pAA-6 b CD/pAA-Fc sol recovered to 90% of its initial state in 20 s | 24 h, 24 °C, 84 % efficiency                      | Sol-gel phase transition | Not mentioned |
| Dex-L-PEG <sup>[8]</sup>               | Storage modulus = ~ 5000 Pa from strain amplitude sweep ( $\gamma$ = 1.0%) of rheological test                     | 7 h, pH =7.4 ,37 °C, 98.7% healing efficiency     | None                     | Not mentioned |
| GCS-PEG <sup>[9]</sup>                 | Storage modulus = ~ 1000 Pa from amplitude oscillatory forces ( $\gamma$ = 1.0%) of rheological test               | within 15 min, centrally punched hole disappeared | Injectable               | Not mentioned |

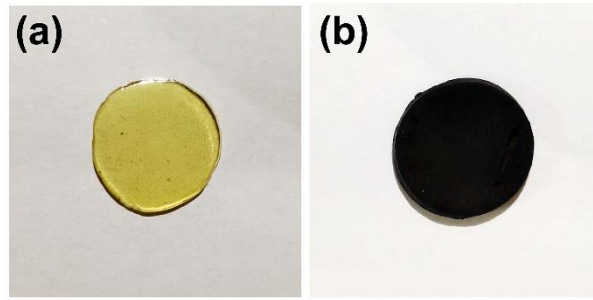

Figure S1. Photographs of PUAS(a) and PUASPy-0.2(b) hydrogels

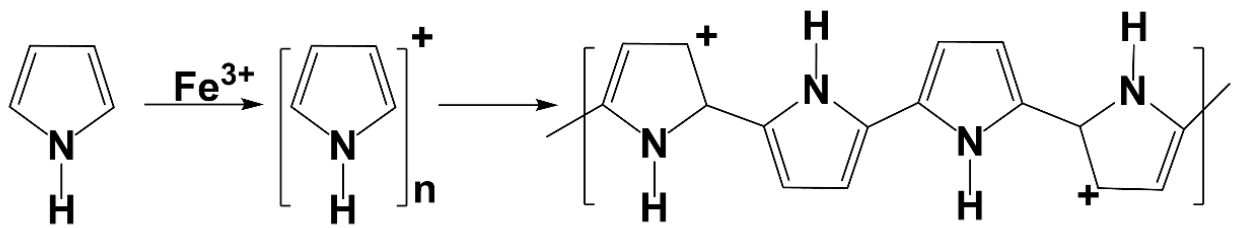

Figure S2. The mechanism of pyrrole polymerization

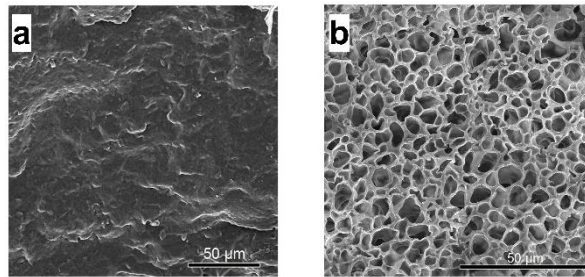

Figure S3. SEM micrographs of the PU0(a)/PU1(b) hydrogels (freeze-dried).

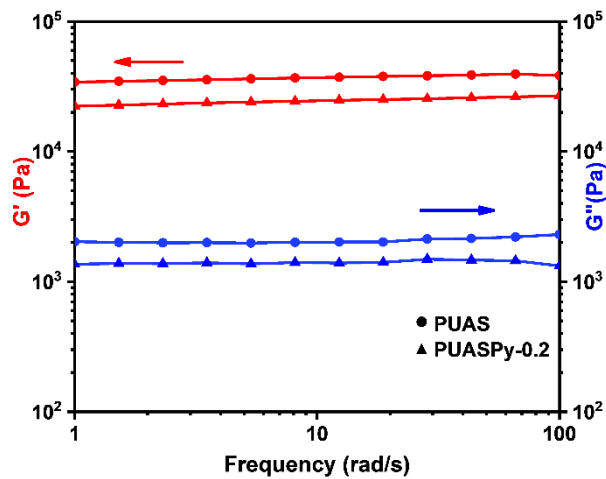

Figure S4. Storage modulus( $G'$ ) and loss modulus( $G''$ ) of PUAS and PUASPy-0.2 hydrogels

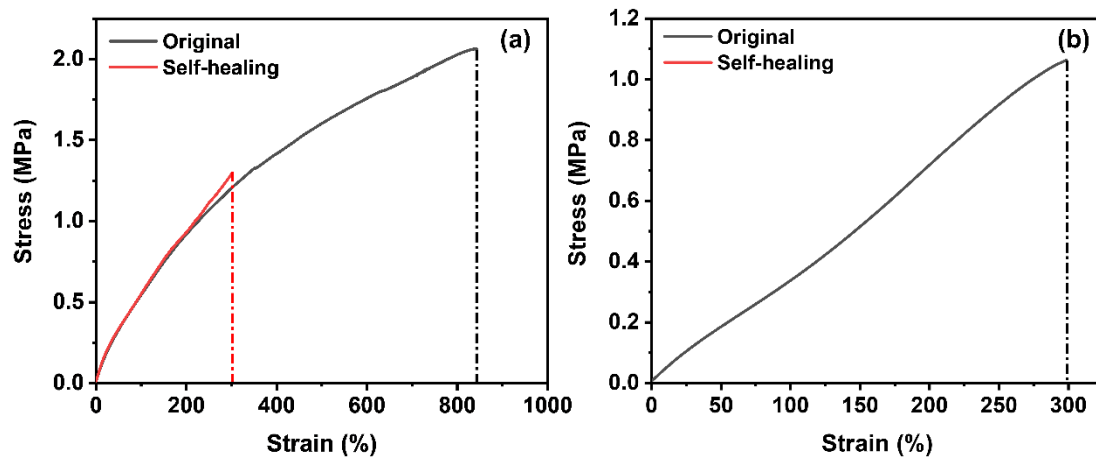

**Figure S5.** Tensile stress-strain curves of PUAS (a), PU0-0.2 (b) hydrogels at original and self-healing states

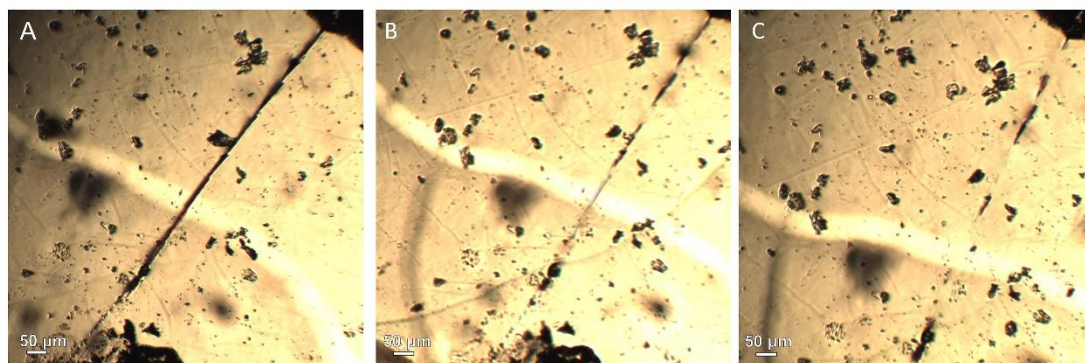

**Figure S6.** Optical microscopy images that recorded changes of the incision on the PUAS gel over time at 50 °C: A, 0 min; B, 5 min; C, 10 min

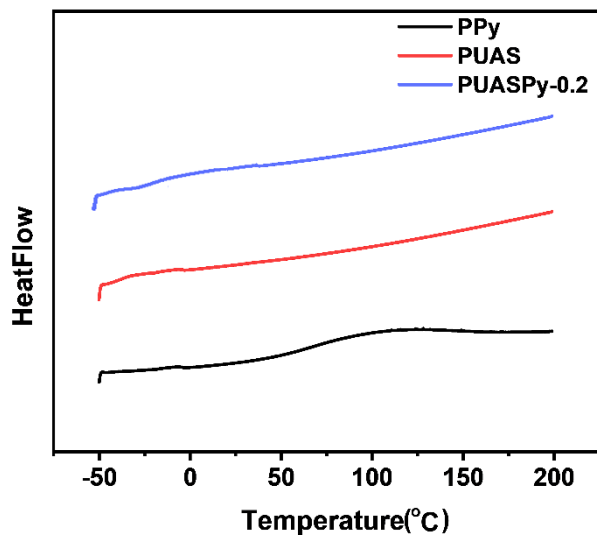

**Figure S7.** DSC of PPy, PUAS and PUASPy-0.2

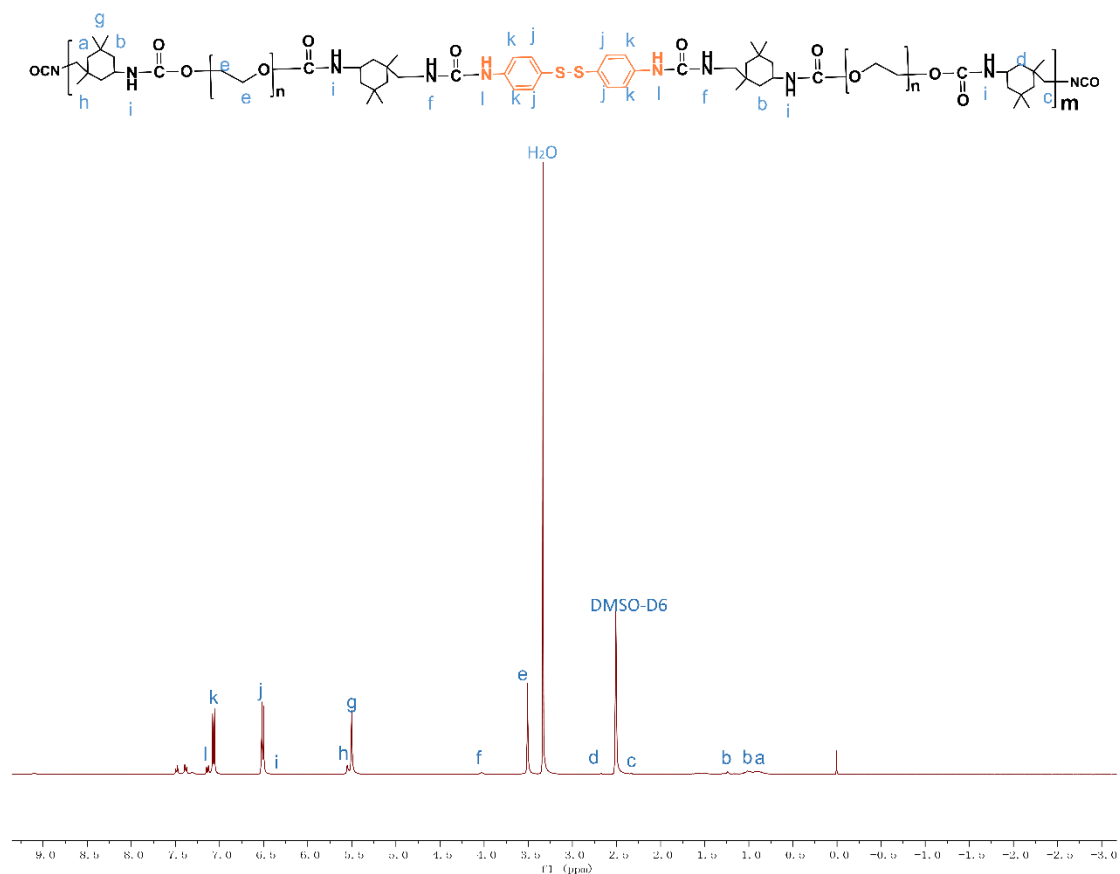

**Figure S8.** <sup>1</sup>H NMR spectrum (DMSO-D<sub>6</sub>) of PU prepolymer. δ (ppm) = 2.50-2.52 (DMSO-D<sub>6</sub>); 0.89, 0.97, 1.24, 2.34, 2.70 (H<sub>a</sub>, H<sub>b</sub>, H<sub>c</sub>, H<sub>d</sub> -CH<sub>2</sub> of IPDI); 3.51 (H<sub>e</sub>, -CH<sub>2</sub>-CH<sub>2</sub>- of PEG); 4.04, 6.30, 7.14 (H<sub>f</sub>, H<sub>i</sub>, H<sub>l</sub>, -NH-); 5.51-5.56 (H<sub>g</sub>, H<sub>h</sub> -CH<sub>3</sub> of IPDI), 6.51 (H<sub>j</sub>, -CH- of APDS), 7.07 (H<sub>k</sub>, -CH- of APDS)

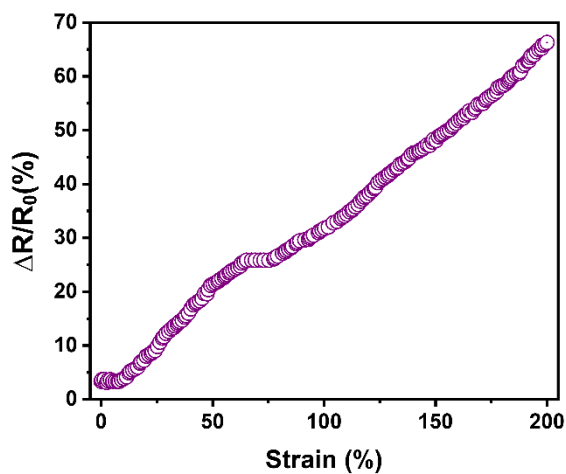

**Figure S9.** Resistance-strain curve of PUASPy-0.2 hydrogel

#### REFERENCE:

1. Y. Lin and G. Li, *J Mater Chem B*, 2014, **2**, 6878-6885.
2. H. Fan, J. Wang and Z. Jin, *Macromolecules*, 2018, **51**, 1696-1705.
3. C. Shao, M. Wang, H. Chang, F. Xu and J. Yang, *ACS Sustainable Chemistry & Engineering*, 2017, **5**, 6167-6174.
4. J. Chen, Q. Peng, T. Thundat and H. Zeng, *Chemistry of Materials*, 2019, **31**, 4553-4563.
5. A. Phadke, C. Zhang, B. Arman, C. C. Hsu, R. A. Mashelkar, A. K. Lele, M. J. Tauber, G. Arya and S. Varghese, *Proc Natl Acad Sci U S A*, 2012, **109**, 4383-4388.
6. M. Nakahata, Y. Takashima, H. Yamaguchi and A. Harada, *Nat Commun*, 2011, **2**, 511.
7. Z. Wei, J. H. Yang, X. J. Du, F. Xu, M. Zrinyi, Y. Osada, F. Li and Y. M. Chen, *Macromol Rapid Commun*, 2013, **34**, 1464-1470.
8. B. Yang, Y. Zhang, X. Zhang, L. Tao, S. Li and Y. Wei, *Polymer Chemistry*, 2012, **3**, 3235-3238.
9. S. M. Kim, H. Jeon, S. H. Shin, S. A. Park, J. Jegal, S. Y. Hwang, D. X. Oh and J. Park, *Adv Mater*, 2018, **30**, 1705145.
